# Supplementary material for: Inosine induces context-dependent recoding and translational stalling
Source: PubMed Central journal article supplement (PMC6326813; doi:10.1093/nar/gky1163), 2018-11-20

## **Supplementary Information**

### **Inosine induces context-dependent recoding and translational stalling**

Konstantin Licht, Markus Hartl, Fabian Amman, Dorothea Anrather, Michael P. Janisiw,  
Michael F. Jantsch

#### **Table of Contents**

|                           |           |
|---------------------------|-----------|
| Supplementary Figure S1:  | page 2    |
| Supplementary Table S1:   | page 3-5  |
| Supplementary Dataset S1: | page 6-23 |

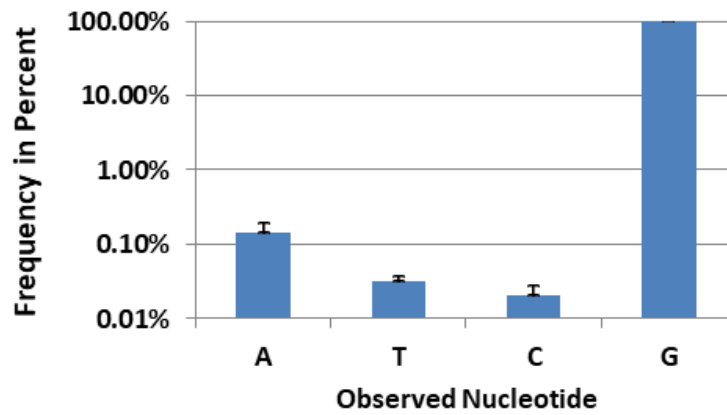

**Supplementary Figure S1.** The fidelity of *in vitro* transcription with inosine is very high. Using RT-PCR and amplicon-seq the rate of mis-incorporation of other nucleotides instead of inosine was tested. The frequency of all nucleotides detected at positions with inosine is given. n=11, error bars = s.e.m.

**Supplementary Table S1.** All measured peak intensities for the detected peptides after *in vitro* translation, affinity purification, and mass spectrometry of inosine-containing codons. Sample#: number of sample, reflects also the order of measurement. Codon: inosine-containing codon. Decoding/Interpretation: Codon (either A, U, G), truncation (truncated peptide), STOP (Stop-codon), carryover (in 3 samples a peptide from the previous run was detected. For these three samples we have analyzed the wash runs between samples and could detect the peptide-signal with decreasing intensities, strongly arguing for carryover). Peptide: peptides detected. Summed peak intensities (log2) using Skyline (the summed intensities of all fragments that could be assigned to the respective peptide, log2).

| Sample# | Codon | Decoding/<br>Interpretation | Peptide        | Summed peak<br>intensities<br>(log2)<br>using Skyline | Remarks |
|---------|-------|-----------------------------|----------------|-------------------------------------------------------|---------|
| 1       | AIC   | AGC                         | SSFYSLTSSNISK  | 32.34                                                 |         |
| 2       | CIA   | CGA                         | SSFYSLTRSNIK   | 32.26                                                 |         |
| 3       | CII   | CGG                         | SSFYSLTRSNIK   | 34.49                                                 |         |
|         | CII   | truncation                  | SSFYSLTS*      | 30.88                                                 |         |
| 4       | UIA   | STOP                        | SSFYSLTS*      | 29.2                                                  |         |
| 5       | IUA   | GUA                         | SSFYSLTSVSNISK | 33.62                                                 |         |
|         | IUA   | truncation                  | SSFYSLTS*      | 29.49                                                 |         |
| 6       | IAA   | GAA                         | SSFYSLTSESNIK  | 33.16                                                 |         |
|         | IAA   | AAA                         | SSFYSLTSK      | 27.33                                                 |         |
|         | IAA   | truncation                  | SSFYSLTS*      | 29.01                                                 |         |
| 7       | ICC   | GCC                         | SSFYSLTASNIK   | 33.24                                                 |         |
|         | ICC   | ACC                         | SSFYSLTTSNIK   | 25.39                                                 |         |
|         | ICC   | truncation                  | SSFYSLTS*      | 28.06                                                 |         |
| 8       | IAU   | GAU                         | SSFYSLTSDSNISK | 34.23                                                 |         |
|         | IAU   | truncation                  | SSFYSLTS*      | 29.09                                                 |         |
| 9       | ICU   | GCU                         | SSFYSLTASNIK   | 33.78                                                 |         |
|         | ICU   | ACU                         | SSFYSLTTSNIK   | 24.54                                                 |         |
|         | ICU   | truncation                  | SSFYSLTS*      | 28.44                                                 |         |
| 10      | All   | AGG                         | SSFYSLTRSNIK   | 33.97                                                 |         |

|    |     |                  |                |       |                             |
|----|-----|------------------|----------------|-------|-----------------------------|
|    | All | truncation       | SSFYSLTS*      | 29.5  |                             |
| 11 | IUU | GUU              | SSFYSLTSVSNISK | 33.44 |                             |
|    | IUU | truncation       | SSFYSLTS*      | 28.02 |                             |
| 12 | IAC | GAC              | SSFYSLTSDSNISK | 32.93 |                             |
|    | IAC | AAC              | SSFYSLTNSNISK  | 31.19 |                             |
|    | IAC | truncation       | SSFYSLTS*      | 27.08 |                             |
| 13 | UAI | STOP             | SSFYSLTS*      | 29.63 |                             |
|    | UAI | UAU              | SSFYSLTSYSNISK | 23.73 |                             |
| 14 | UII | UGG              | SSFYSLTSWSNISK | 27.8  |                             |
|    | UII | truncation       | SSFYSLTS*      | 28.23 |                             |
| 15 | IUI | GUG              | SSFYSLTSVSNISK | 31.57 |                             |
|    | IUI | truncation       | SSFYSLTS*      | 30.05 |                             |
| 16 | AAI | AAG              | SSFYSLTSK      | 35.87 |                             |
|    | AAI | truncation       | SSFYSLTS*      | 27.83 |                             |
| 17 | CIC | CGC              | SSFYSLTSRSNISK | 33.26 |                             |
|    | CIC | truncation       | SSFYSLTS*      | 28.72 |                             |
|    | CIC | truncation       | SSFYSLTSR      | 29.13 |                             |
|    | CIC | <i>carryover</i> | SSFYSLTSK      | 25.73 | carryover<br>from sample 16 |
| 18 | AIU | AGU              | SSFYSLTSSSNISK | 32.57 |                             |
|    | AIU | truncation       | SSFYSLTS*      | 27.65 |                             |
|    | AIU | <i>carryover</i> | SSFYSLTSK      | 23.73 | carryover<br>from sample 16 |
| 19 | IUC | GUC              | SSFYSLTSVSNISK | 31.53 |                             |
|    | IUC | truncation       | SSFYSLTS*      | 26.35 |                             |
| 20 | ICA | GCA              | SSFYSLTASNISK  | 31.91 |                             |
|    | ICA | ACA              | SSFYSLTTSNISK  | 25.97 |                             |
|    | ICA | UCA              | SSFYSLTSSSNISK | 25.03 |                             |
|    | ICA | truncation       | SSFYSLTS*      | 27.16 |                             |
| 21 | IIU | GGU              | SSFYSLTGSNISK  | 31.19 |                             |
|    | IIU | truncation       | SSFYSLTS*      | 26.71 |                             |
| 22 | IAI | GAG              | SSFYSLTESNISK  | 29.56 |                             |
|    | IAI | AAG/AAA          | SSFYSLTSK      | 26.03 |                             |
|    | IAI | truncation       | SSFYSLTS*      | 32.08 |                             |

|    |     |                  |                         |       |                             |
|----|-----|------------------|-------------------------|-------|-----------------------------|
| 23 | ICI | GCG              | SSFYSLTSA <b>S</b> NISK | 30.62 |                             |
|    | ICI | UCG              | SSFYSLTSS <b>S</b> NISK | 24.11 |                             |
|    | ICI | truncation       | SSFYSLTS*               | 31.46 |                             |
| 24 | UIC | UGC              | SSFYSLTSC <b>S</b> NISK | 31.84 |                             |
|    | UIC | truncation       | SSFYSLTS*               | 27.63 |                             |
| 25 | UIU | UGU              | SSFYSLTSC <b>S</b> NISK | 30.23 |                             |
|    | UIU | truncation       | SSFYSLTS*               | 26.35 |                             |
| 26 | CAI | CAG              | SSFYSLTSQ <b>S</b> NISK | 32.37 |                             |
|    | CAI | truncation       | SSFYSLTS*               | 27.36 |                             |
| 27 | IIC | GGC              | SSFYSLTSG <b>S</b> NISK | 32.22 |                             |
|    | IIC | truncation       | SSFYSLTS*               | 26.36 |                             |
|    | IIC | <i>carryover</i> | SSFYSLTSQ <b>S</b> NISK | 22.93 | carryover<br>from sample 26 |
| 28 | III | GGG              | SSFYSLTSG <b>S</b> NISK | 33.08 |                             |
|    | III | truncation       | SSFYSLTS*               | 32.25 |                             |
| 29 | CIU | CGU              | SSFYSLTSR <b>S</b> NISK | 30.99 |                             |
|    | CIU | truncation       | SSFYSLTS*               | 25.73 |                             |
| 30 | AIA | AGA              | SSFYSLTSR <b>S</b> NISK | 29.39 |                             |
|    | AIA | truncation       | SSFYSLTS*               | 25.73 |                             |
| 31 | AUI | AUG              | SSFYSLTSM <b>S</b> NISK | 31.83 |                             |
|    | AUI | truncation       | SSFYSLTS*               | 27    |                             |
| 32 | IIA | GGA              | SSFYSLTSG <b>S</b> NISK | 32.17 |                             |
|    | IIA | AGA              | SSFYSLTSR <b>S</b> NISK | 26.51 |                             |
|    | IIA | truncation       | SSFYSLTS*               | 28.41 |                             |
| 33 | UUI | UUG              | SSFYSLTSL <b>S</b> NISK | 26.8  |                             |
|    | UUI | truncation       | SSFYSLTS*               | 26.72 |                             |

**Supplementary Dataset S1.** Representative spectra for all detected peptides. Spectra (taken from MaxQuant) are shown. If the same peptide occurred in multiple samples, one spectra was randomly chosen.

Scan 11261 Method FTMS; HCD Score 94.16 m/z 446.21

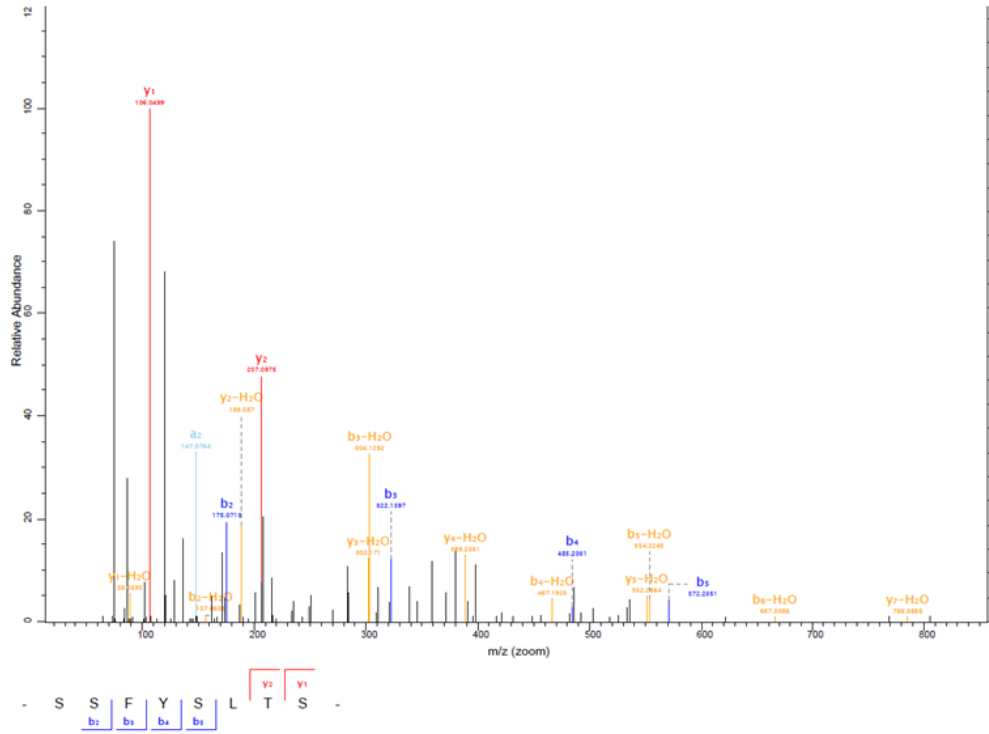

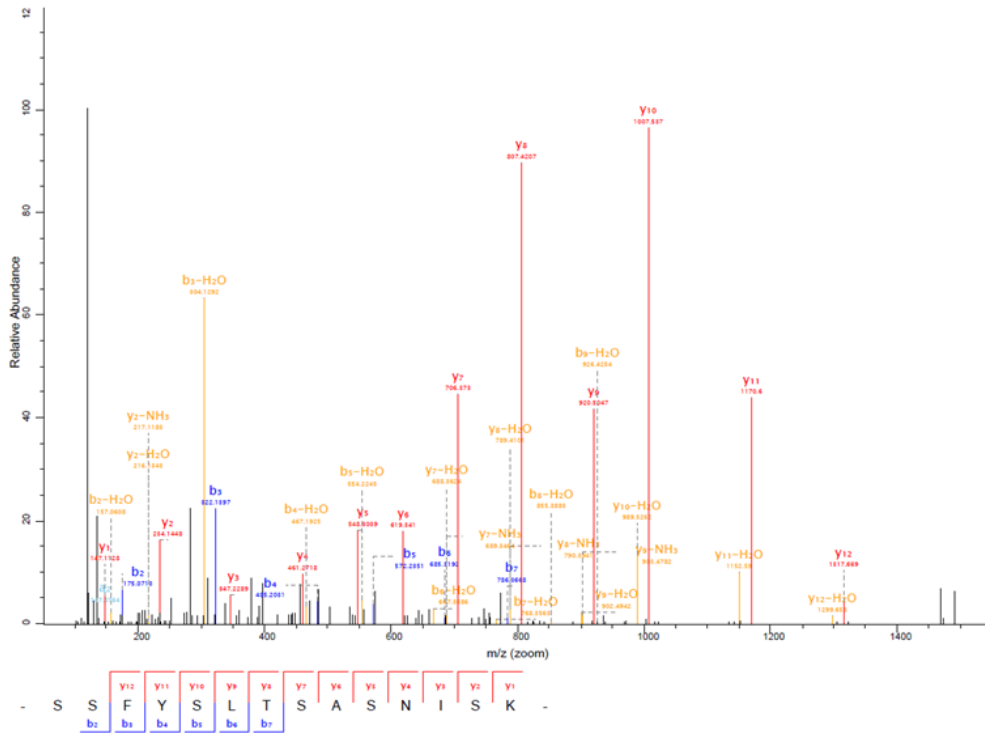



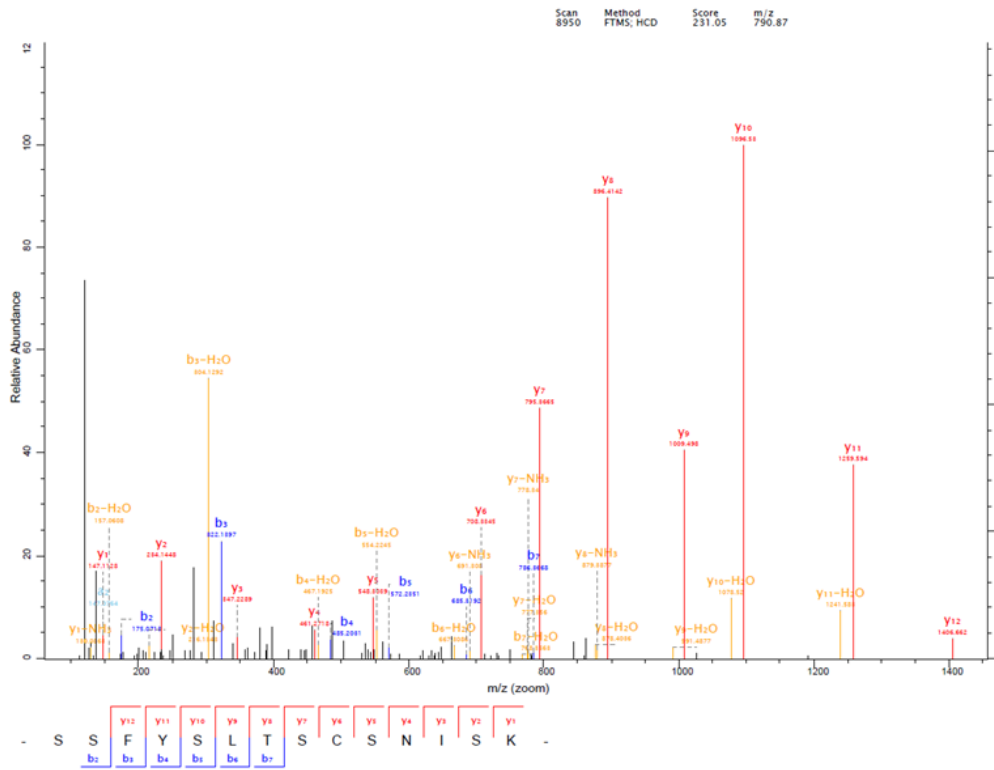

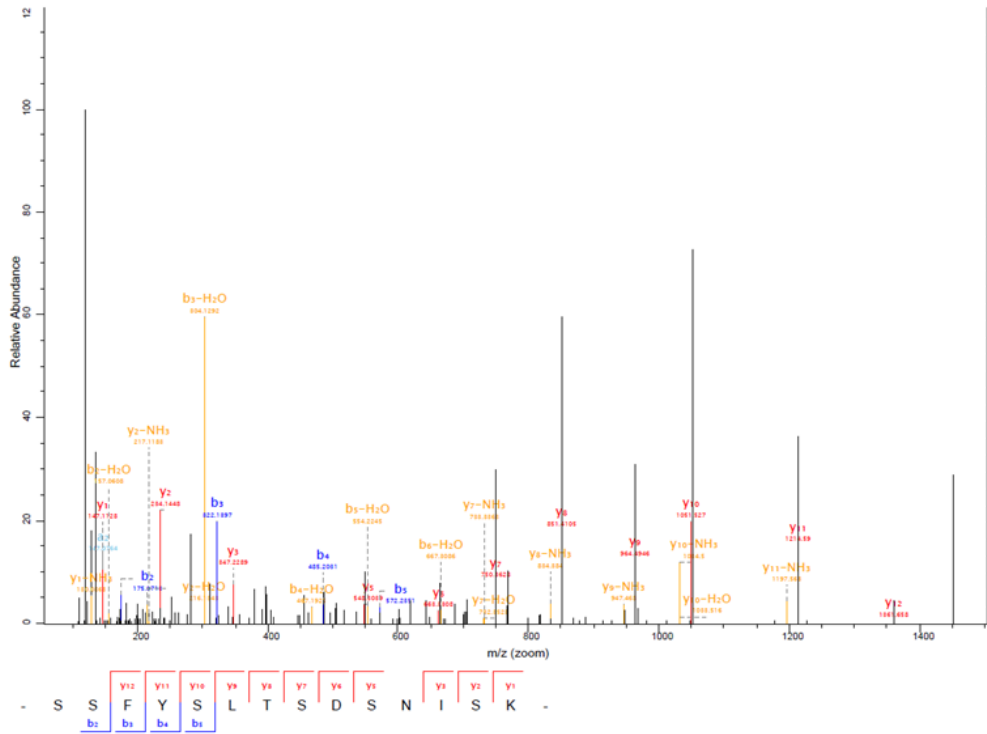

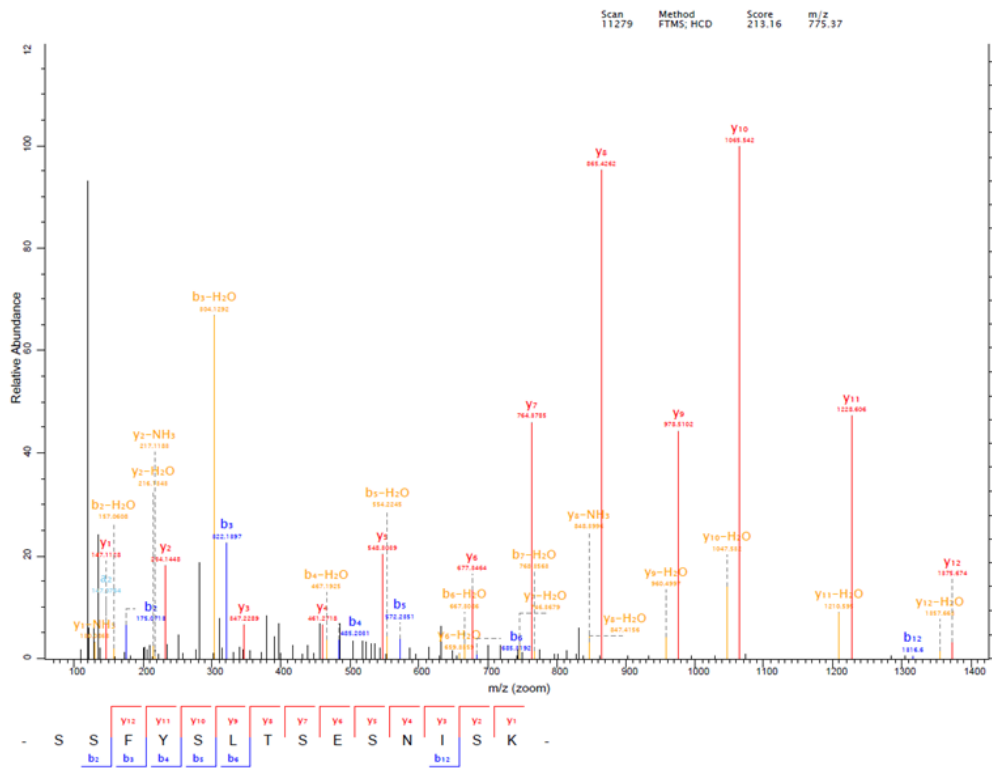

Scan 9043 Method FTMS; HCD Score 229.68 m/z 739.36

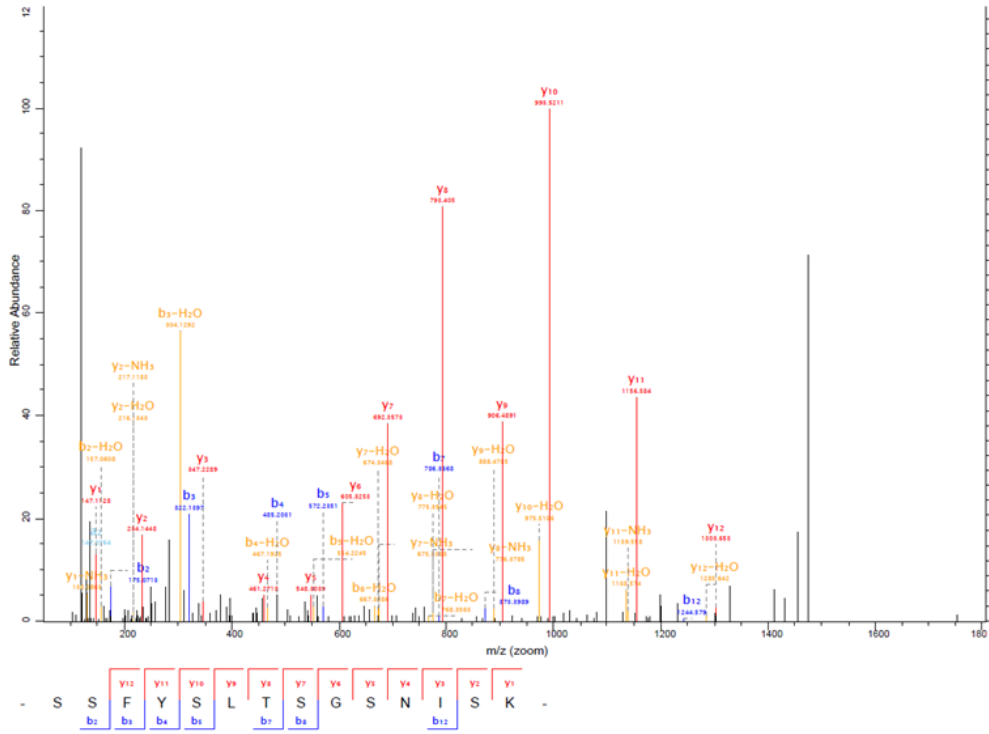

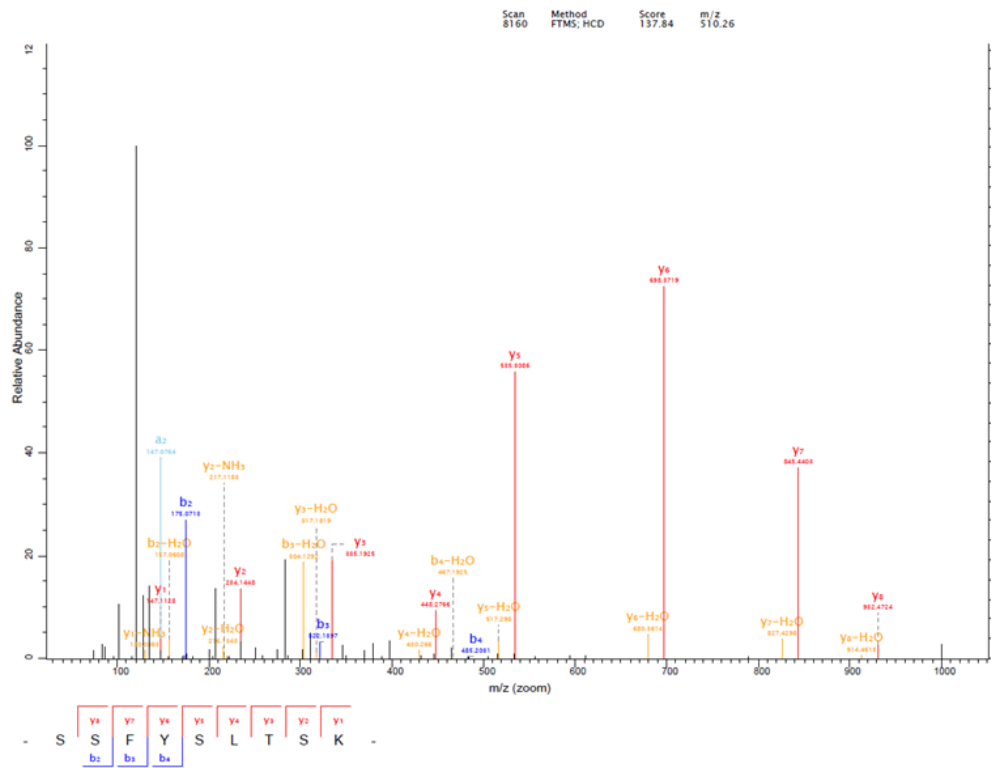

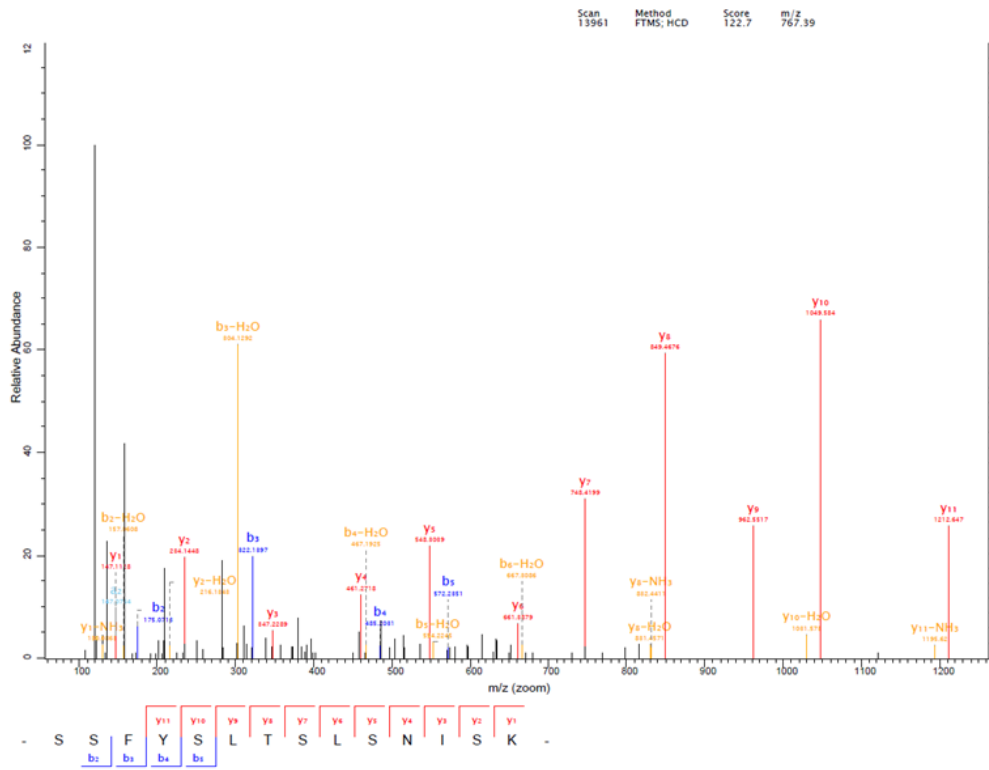

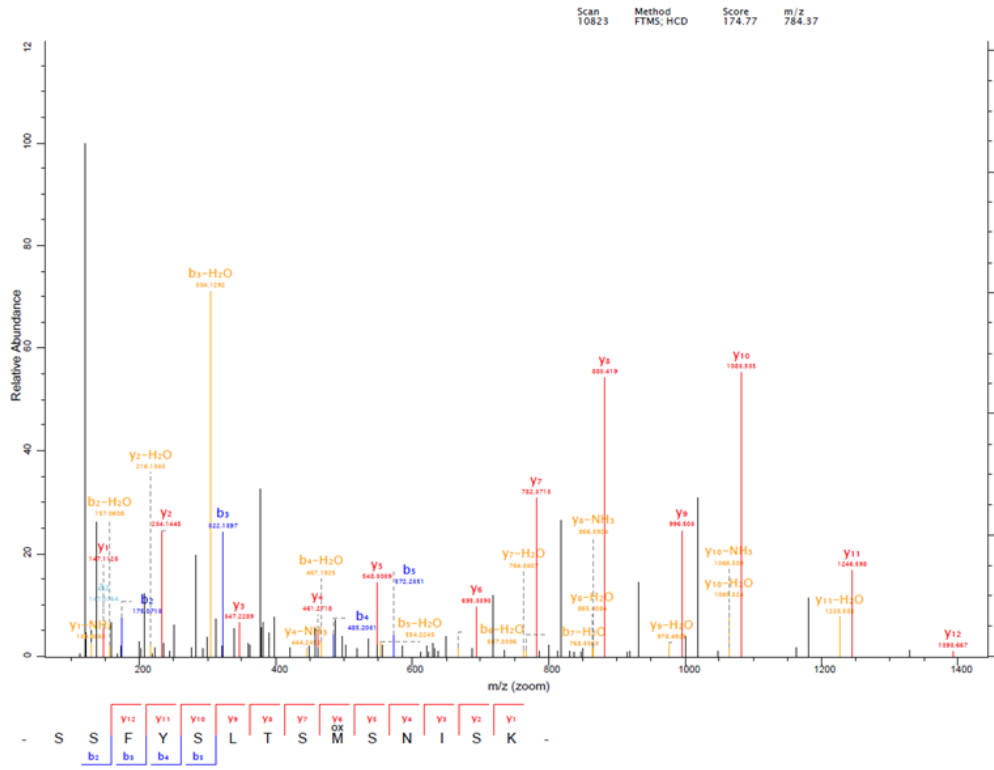

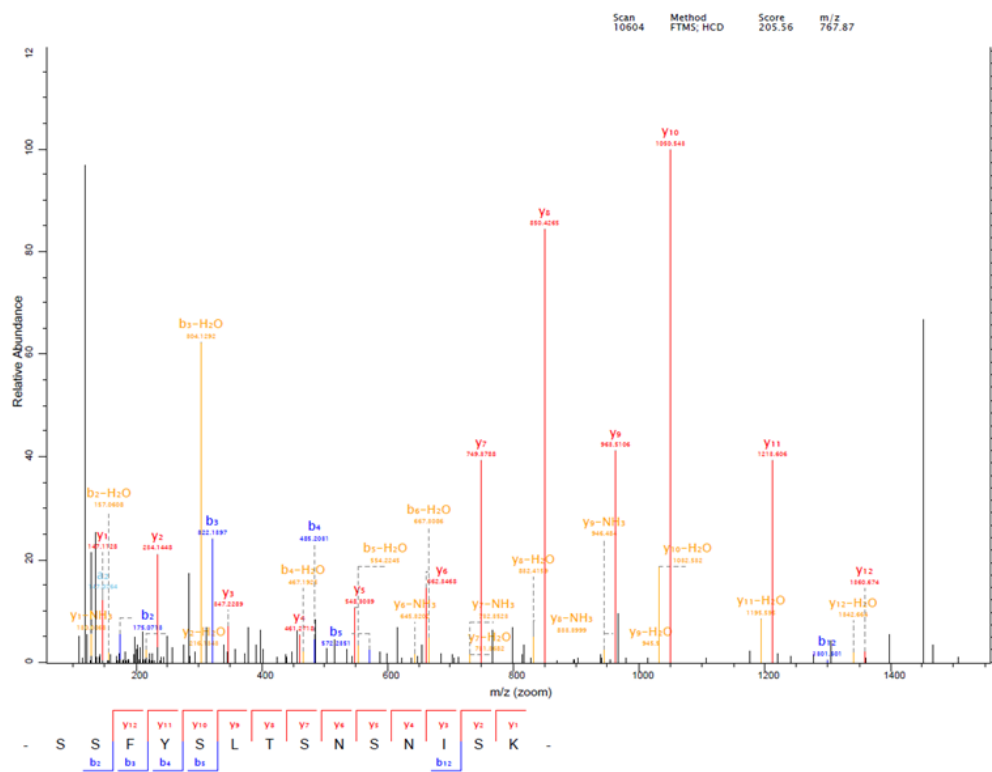



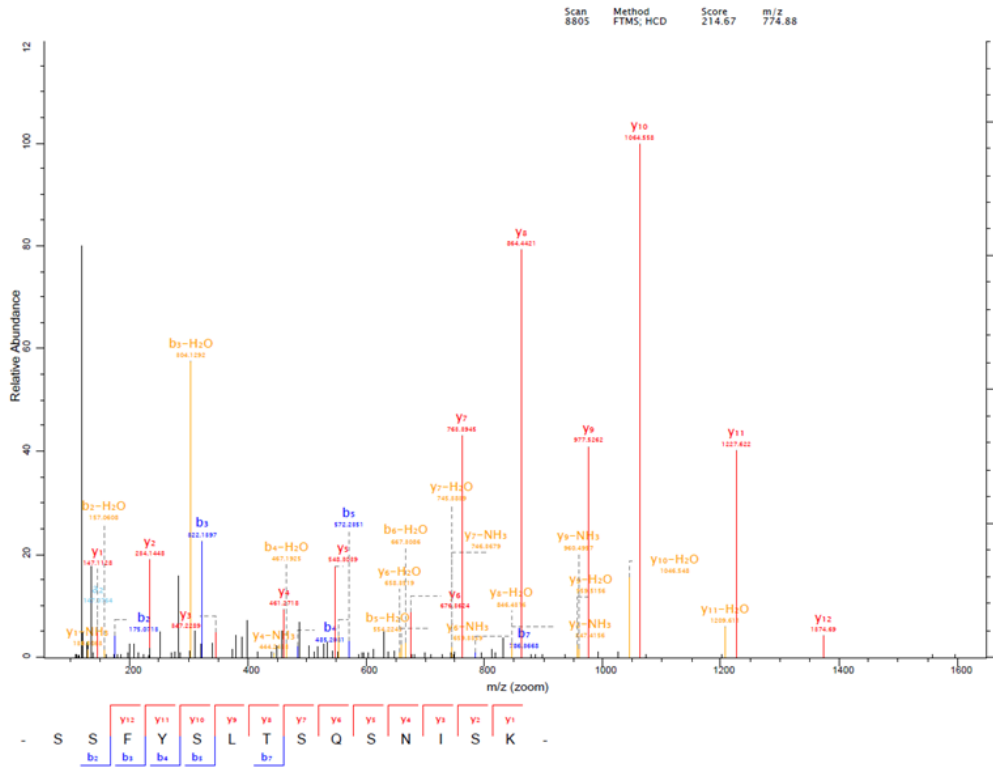

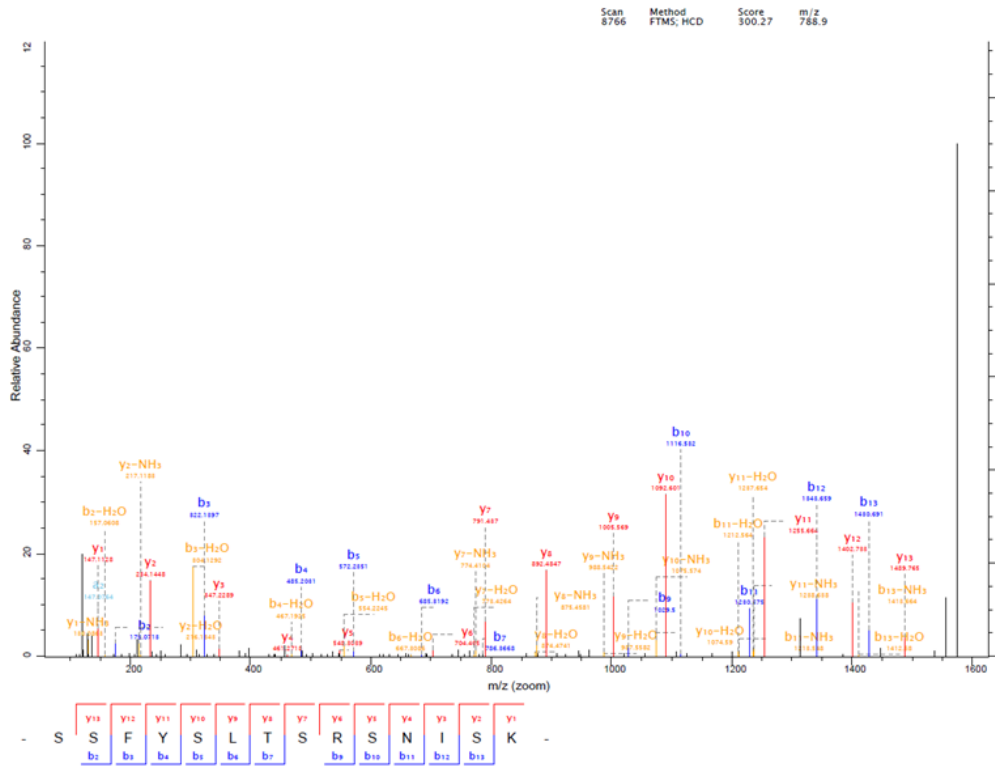

Scan 9099 Method FTMS; HCD Score 200.06 m/z 754.37

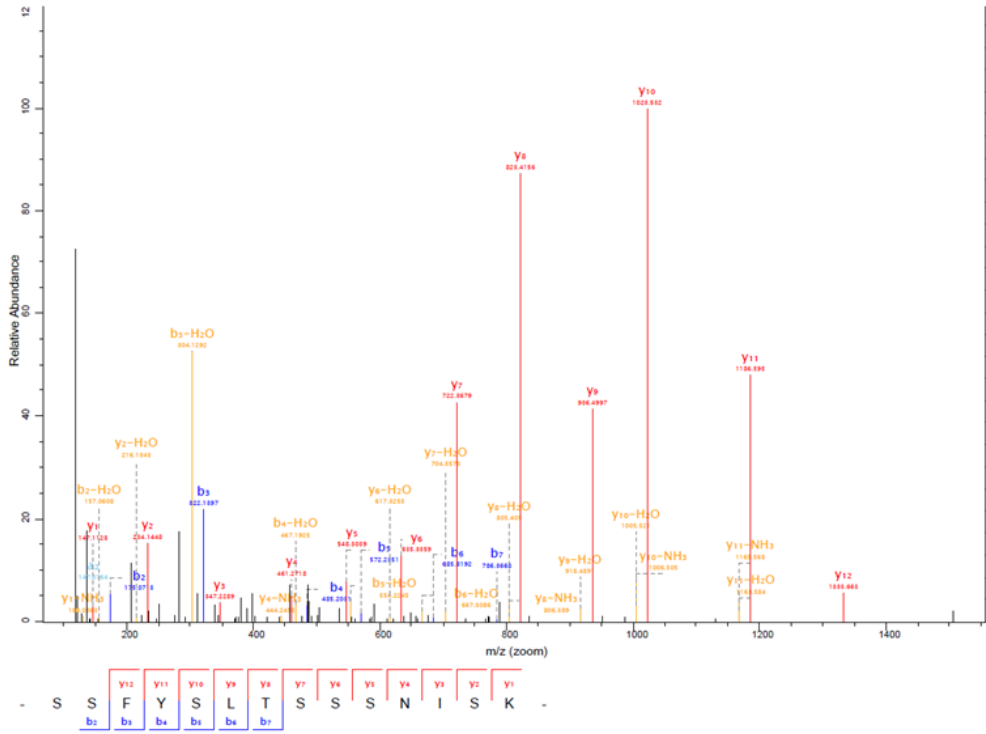

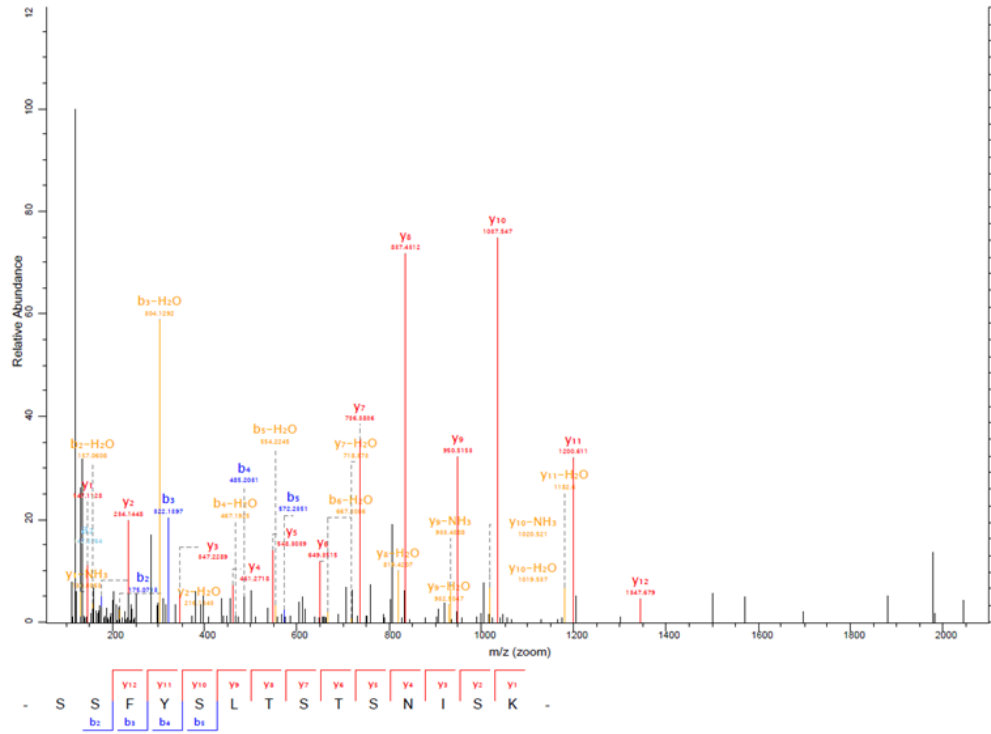

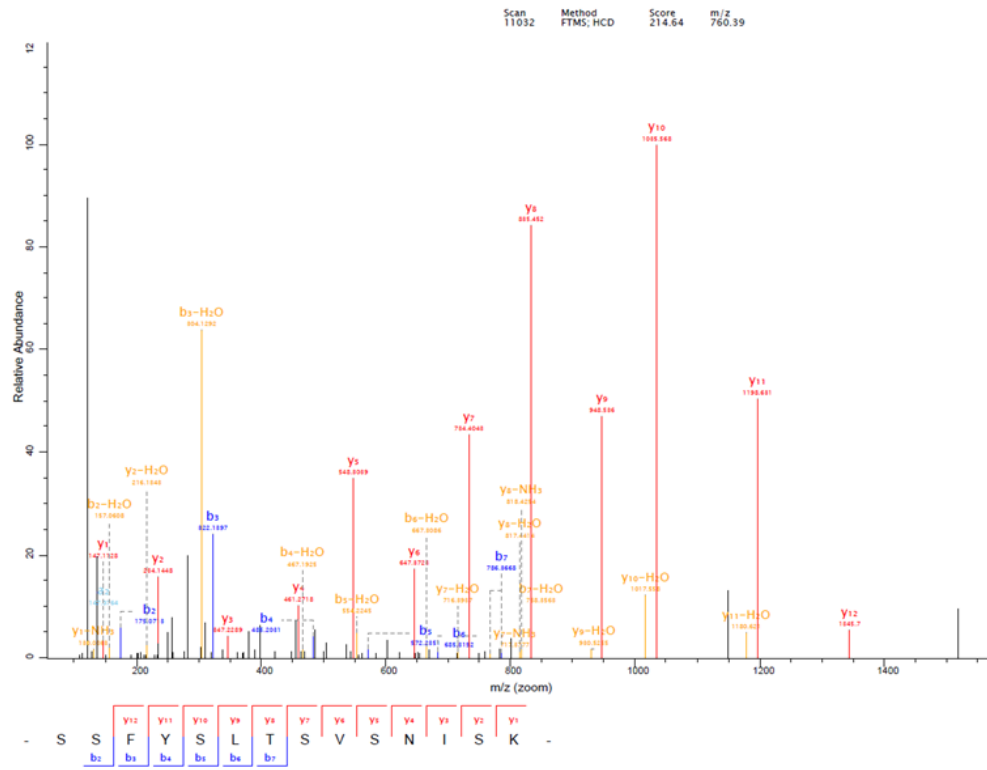

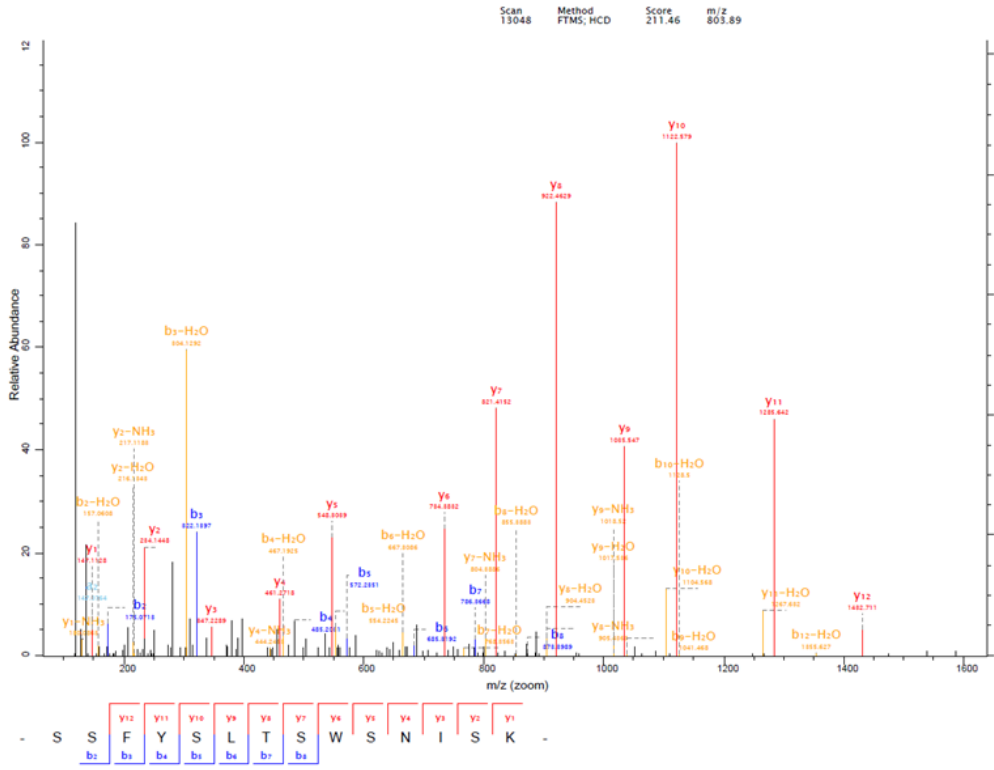

Scan 12906 Method FTMS; HCD Score 158.56 m/z 792.38

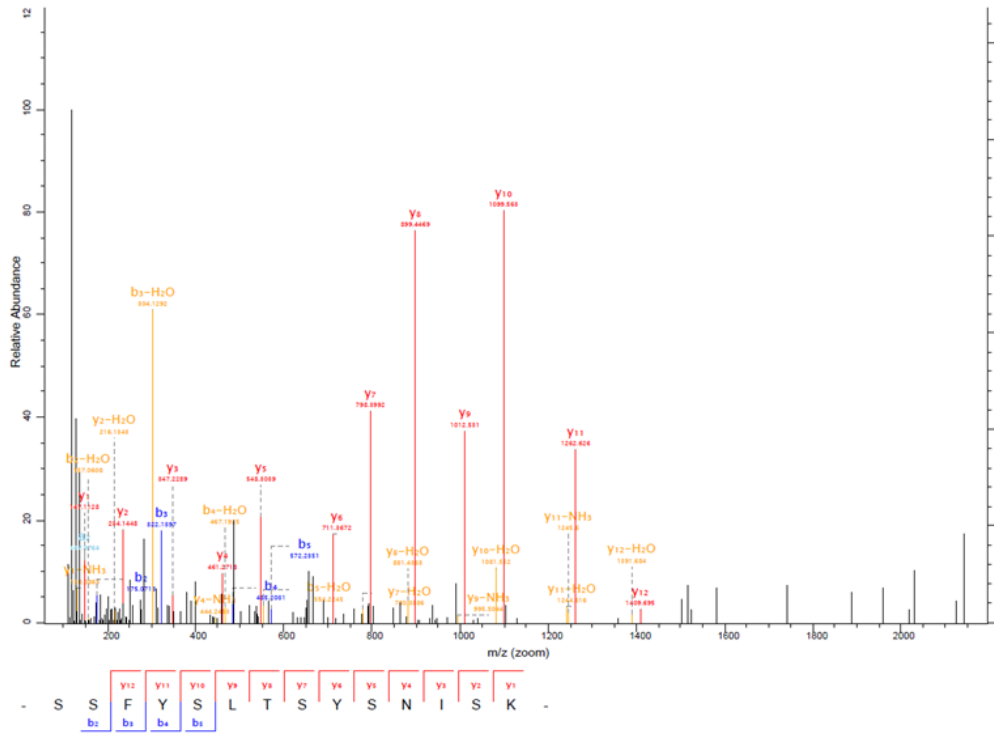

Supplement: gky1163_supplemental_files.pdf [file gky1163_supplemental_files.pdf]
